# Supplementary material for: Ethnobotany, Phytochemistry, Biological, and Nutritional Properties of Genus Crepis—A Review
Source: MDPI journal article supplement (doi:10.3390/plants11040519), 2022-02-14
Supplement: s1 [file s1]

**Table S1.** *Crepis* taxa studied so far and their synonyms. Accepted botanical name in bold according to The Plant List [2]

|                                                                           |                                                                                                                                                                                                                                                                                                                                                                                                                                                                                                                                                                                  |
|---------------------------------------------------------------------------|----------------------------------------------------------------------------------------------------------------------------------------------------------------------------------------------------------------------------------------------------------------------------------------------------------------------------------------------------------------------------------------------------------------------------------------------------------------------------------------------------------------------------------------------------------------------------------|
| <b><i>C. alpestris</i> (Jacq.) Tausch</b>                                 | <i>C. grandiflora</i> Willd.; <i>C. longifolia</i> Hegetschw.; <i>C. mucronata</i> (Bertol.) Nyman                                                                                                                                                                                                                                                                                                                                                                                                                                                                               |
| <i>C. alpina</i> L.                                                       |                                                                                                                                                                                                                                                                                                                                                                                                                                                                                                                                                                                  |
| <i>C. aspera</i> L.                                                       |                                                                                                                                                                                                                                                                                                                                                                                                                                                                                                                                                                                  |
| <b><i>C. aurea</i> (L.) Cass.</b>                                         | <i>C. kitaibelii</i> Froel.                                                                                                                                                                                                                                                                                                                                                                                                                                                                                                                                                      |
| <i>C. biennis</i> L.                                                      |                                                                                                                                                                                                                                                                                                                                                                                                                                                                                                                                                                                  |
| <i>C. bioniana</i> Soldano & F. Conti                                     | <b><i>Crepis vesicaria</i> subsp. <i>bioniana</i> (Soldano &amp; F.Conti) Giardina &amp; Raimondo</b> ; <i>Crepis purpurea</i> (Biv.) Steud.                                                                                                                                                                                                                                                                                                                                                                                                                                     |
| <i>C. bocconi</i> P. D. Sell.                                             | <b><i>C. pontana</i> (L.) Dalla Torre</b>                                                                                                                                                                                                                                                                                                                                                                                                                                                                                                                                        |
| <b><i>C. bursifolia</i> L.</b>                                            | <i>Crepis balbisiana</i> (DC.) F.W.Schultz                                                                                                                                                                                                                                                                                                                                                                                                                                                                                                                                       |
| <i>C. cameroonica</i> Babcock ex Hutchinson & Dalziel                     | <b><i>C. newii</i> subsp. <i>oliveriana</i> (Kuntze) C.Jeffrey &amp; Beentje</b>                                                                                                                                                                                                                                                                                                                                                                                                                                                                                                 |
|                                                                           | <i>C. agrestis</i> Waldst. & Kit. ex Willd.; <i>C. bauhiniana</i> Tausch; <i>C. candollei</i> Sch.Bip.; <i>C. diffusa</i> DC.; <i>C. druceana</i> Murr ex Druce; <i>C. gaditana</i> Boiss.; <i>C. leiosperma</i> DC.; <i>C. linifolia</i> Thuill.; <i>C. longepinnatifida</i> Chevall.; <i>C. lusitanica</i> Boiss.; <i>C. neglecta</i> M. Bieb.; <i>C. nemorum</i> Pourr. ex Willk. & Lange; <i>C. parviflora</i> Moench; <i>C. pinnatifida</i> Willd.; <i>C. uniflora</i> Thuill.; <i>C. variabilis</i> Krock.; <i>C. virens</i> L.                                            |
| <b><i>C. capillaris</i> (L.) Wallr.</b>                                   | <i>Crepis ellenbeckii</i> R.E.Fr.; <i>Crepis glandulosissima</i> R.E.Fr.; <i>Crepis scaposa</i> R.E.Fr.                                                                                                                                                                                                                                                                                                                                                                                                                                                                          |
| <i>C. carbonaria</i> Sch. Bip                                             | <i>C. brachypappa</i> Bornm.; <i>C. foetida</i> f. <i>bulgarica</i> (Velen.) Babc.; <i>C. foetida</i> subsp. <i>commutata</i> (Spreng.) Babc.; <i>C. foetida</i> f. <i>gracilis</i> (Freyn & Sint.) Babc.                                                                                                                                                                                                                                                                                                                                                                        |
| <b><i>C. commutata</i> (Spreng.) Greuter</b>                              | <i>C. amphiboena</i> Gand.; <i>C. balcanica</i> Velen.; <i>C. djimilensis</i> K. Koch; <i>C. grandiflora</i> Ledeb.; <i>C. orbelica</i> Velen.; <i>C. perrieri</i> Gand.; <i>C. sagittata</i> Wender.; <i>C. trojanensis</i> Urum.                                                                                                                                                                                                                                                                                                                                               |
| <b><i>C. conyzifolia</i> (Gouan) Kern</b>                                 | <i>C. czuensis</i> Serg.; <i>C. gmelinii</i> var. <i>grandiflora</i> Tausch; <i>C. pallasii</i> var. <i>pallasii</i> Ledeb.; <i>C. turczaninowii</i> C.A.Mey.                                                                                                                                                                                                                                                                                                                                                                                                                    |
| <b><i>C. crocea</i> (Lam.) Babcock</b>                                    | <i>C. bergeri</i> (Sch. Bip.) Steud.; <i>C. croatica</i> Hornem.; <i>C. dentata</i> Gaterau, Descr.; <i>C. heterosperma</i> Spreng.; <i>C. pterosperma</i> Hort. ex DC. <i>C. tomentosa</i> Moench; <i>C. tubaeformis</i> Halácsy                                                                                                                                                                                                                                                                                                                                                |
| <i>C. dioscoridis</i> L.                                                  |                                                                                                                                                                                                                                                                                                                                                                                                                                                                                                                                                                                  |
| <b><i>C. divaricata</i> Boss. &amp; Heldr</b>                             | <b><i>Askellia flexuosa</i> (Ledeb.) W.A.Weber</b> ; <i>Crepis glauca</i> Hook.f.; <i>Crepis kusnezovii</i> Pavlov;                                                                                                                                                                                                                                                                                                                                                                                                                                                              |
| <i>C. flexuosa</i> (Ledeb.) Benth. ex C.B.Clarke                          | <i>Crepis melanthera</i> C.H.An                                                                                                                                                                                                                                                                                                                                                                                                                                                                                                                                                  |
|                                                                           | <i>C. amygdalina</i> Lag.; <i>C. eritreensis</i> Babc.; <i>C. fallax</i> Boiss.; <i>C. foetens</i> Link; <i>C. gracilis</i> Lej.; <i>C. graveolens</i> (G.Gaertn. & al.) Schrad. ex Steud.; <i>C. insularis</i> Moris & De Not.; <i>C. interrupta</i> Sm.; <i>C. kotschyana</i> C.B.Clarke; <i>C. prostrata</i> (Dumort.) Michot; <i>C. radiata</i> Nyman; <i>C. radicata</i> Sm.; <i>C. rodigioides</i> Sch.Bip.; <i>C. schimperii</i> (Sch.Bip. ex A.Rich.) Schweinf.; <i>C. thomsonii</i> Babc.; <i>C. thracia</i> Spreng.; <i>C. zacinthia</i> (Margot & Reut. ex DC.) Nyman |
| <b><i>C. foetida</i> L.</b>                                               | <i>C. interrupta</i> Sieber ex DC.; <i>C. nemetzii</i> Rech.f.; <i>C. nestmeieri</i> F.Herm. & Degen; <i>C. rhoeadifolia</i> M.Bieb.; <i>C. stribnyi</i> Velen.                                                                                                                                                                                                                                                                                                                                                                                                                  |
| <b><i>C. foetida</i> L. subsp. <i>rhoeadifolia</i> (Bieb.) Celak.</b>     | <i>C. praemorsa</i> subsp. <i>corymbosa</i> (Gaudin) P.D.Sell                                                                                                                                                                                                                                                                                                                                                                                                                                                                                                                    |
| <b><i>C. froelichiana</i> DC.</b>                                         | <b><i>Crepis runcinata</i> subsp. <i>glauca</i> (Nutt.) Babc. &amp; Stebbins</b> ; <i>Crepis chamaephylla</i> Wooton & Standl                                                                                                                                                                                                                                                                                                                                                                                                                                                    |
| <i>C. glauca</i> Torr. and Gray                                           |                                                                                                                                                                                                                                                                                                                                                                                                                                                                                                                                                                                  |
| <b><i>C. hakkarica</i> Lamond</b>                                         | <b><i>Crepis vesicaria</i> subsp. <i>hyemalis</i> (Biv.) Babc.</b> ; <i>Crepis reflexa</i> Guss.; <i>Crepis taraxacifolia</i> subsp. <i>hyemalis</i> (Biv.) Arcang.                                                                                                                                                                                                                                                                                                                                                                                                              |
| <i>C. hyemalis</i> (Biv.) Cess., Pass. & Gibelli                          |                                                                                                                                                                                                                                                                                                                                                                                                                                                                                                                                                                                  |
| <b><i>C. incana</i> Sm.</b>                                               | <i>C. acuminata</i> var. <i>intermedia</i> (A.Gray) Jeps.                                                                                                                                                                                                                                                                                                                                                                                                                                                                                                                        |
| <b><i>C. intermedia</i> Gray</b>                                          | <i>C. kernerii</i> Rech.f.                                                                                                                                                                                                                                                                                                                                                                                                                                                                                                                                                       |
| <b><i>C. jacquinii</i> Tausch subsp. <i>kernerii</i> (Rech.f.) Merxm.</b> | <b><i>Youngia japonica</i> (L.) DC.</b> ; <i>C. fastigiata</i> (Blume) Sch.Bip.; <i>C. formosana</i> Hayata; <i>C. lyrata</i> (Thunb.) C.B.Clarke; <i>C. taquetii</i> (H. Lév. & Vaniot) H. Lév.                                                                                                                                                                                                                                                                                                                                                                                 |
| <i>C. japonica</i> (L.) Benth.                                            | <i>C. erucifolia</i> Tausch; <i>C. latialis</i> Sebast.                                                                                                                                                                                                                                                                                                                                                                                                                                                                                                                          |
| <b><i>C. lacera</i> Ten.</b>                                              | <i>C. aethensis</i> C. Presl; <i>C. pauciflora</i> Poir.; <i>C. triangula</i> C. Presl; <i>C. tuberculata</i> Sch.Bip. ex Nyman                                                                                                                                                                                                                                                                                                                                                                                                                                                  |
| <b><i>C. leontodontoides</i> All.</b>                                     | <i>C. breviflora</i> Delile ex Steud.; <i>C. fuliginosa</i> Webb & Berthel.; <i>C. muricata</i> Sm.; <i>C. parviflora</i> Pers.                                                                                                                                                                                                                                                                                                                                                                                                                                                  |
| <b><i>C. micrantha</i> Czerep.</b>                                        | <i>C. croatica</i> (Waldst. & Kit.) Schloss. & Vuk.; <i>C. hieracioides</i> Willd.; <i>C. hieracioides</i> Willd.; <i>C. velenovskyi</i> Domin                                                                                                                                                                                                                                                                                                                                                                                                                                   |
| <b><i>Crepis mollis</i> (Jacq.) Asch.</b>                                 | <i>C. kochii</i> Tchich.; <i>C. stoliczkai</i> C. B. Clarke                                                                                                                                                                                                                                                                                                                                                                                                                                                                                                                      |
| <b><i>Crepis multicaulis</i> Ledeb.</b>                                   |                                                                                                                                                                                                                                                                                                                                                                                                                                                                                                                                                                                  |
| <b><i>Crepis napifera</i> (Franch.) Babcock</b>                           | <i>Crepis cernua</i> Ten. ex Spreng; <i>Crepis corymbosa</i> var. <i>baetica</i> Willk.; <i>Crepis fuliginosa</i> var. <i>adscendens</i> Sm.; <i>Crepis hyoseroides</i> Sm.; <i>Crepis polymorpha</i> var. <i>stricta</i> (Scop.) Wallr.; <i>Crepis spathulata</i> Lam.; <i>Crepis stricta</i> Scop.                                                                                                                                                                                                                                                                             |
| <i>C. neglecta</i> L                                                      | <i>Crepis corymbosa</i> Ten.; <i>Crepis fuliginosa</i> Sm.                                                                                                                                                                                                                                                                                                                                                                                                                                                                                                                       |
| <b><i>C. neglecta</i> L. subsp. <i>corymbosa</i> (Ten.) Nyman</b>         | <b><i>C. sancta</i> (L.) Bornm.</b>                                                                                                                                                                                                                                                                                                                                                                                                                                                                                                                                              |
| <i>C. nemausensis</i> Gouan                                               |                                                                                                                                                                                                                                                                                                                                                                                                                                                                                                                                                                                  |
| <b><i>C. occidentalis</i> Nutt.</b>                                       |                                                                                                                                                                                                                                                                                                                                                                                                                                                                                                                                                                                  |

|                                                                        |                                                                                                                                                                                                                                                                                                                                                                                                                                                                                                                 |
|------------------------------------------------------------------------|-----------------------------------------------------------------------------------------------------------------------------------------------------------------------------------------------------------------------------------------------------------------------------------------------------------------------------------------------------------------------------------------------------------------------------------------------------------------------------------------------------------------|
| <i>C. paludosa</i> (L.) Moench                                         | <i>C. blavii</i> (Asch.) Stadlm.; <i>C. glochidiata</i> (Prokh.) Prokh.; <i>C. latifolia</i> Balb. ex Pers.; <i>C. rigida</i> Waldst. & Kit.                                                                                                                                                                                                                                                                                                                                                                    |
| <i>C. pannonica</i> (Jacq.) K. Koch                                    | <i>C. cichorioides</i> Gand.; <i>C. costata</i> Candargy; <i>C. cylindrica</i> Cariot & St.-Lag.; <i>C. deloynei</i> Gand.; <i>C. hispanica</i> Pau; <i>C. lapsanifolia</i> Rchb.; <i>C. oxyphylla</i> Gand.; <i>C. pulcherrima</i> Grossh.; <i>C. valentina</i> Willk.; <i>C. vendeana</i> Gand.; <i>C. youngiformis</i> K. Koch                                                                                                                                                                               |
| <i>C. pulchra</i> L.                                                   | <i>C. autaretica</i> Gand.; <i>C. royi</i> Gand.; <i>C. subglabrescens</i> Gand.                                                                                                                                                                                                                                                                                                                                                                                                                                |
| <i>C. pygmaea</i> L.                                                   | <i>C. amplexicaulis</i> Schur; <i>C. austriaca</i> Jacq.; <i>C. blattarifolia</i> St.-Lag.; <i>C. foliosa</i> Dulac                                                                                                                                                                                                                                                                                                                                                                                             |
| <i>C. pyrenaica</i> (L.) Greuter                                       | <i>Crepis pawlowskii</i> Strid                                                                                                                                                                                                                                                                                                                                                                                                                                                                                  |
| <i>C. reuteriana</i> Boiss.                                            | <i>C. heerii</i> Moritzi; <i>C. jubata</i> W.D.J.Koch                                                                                                                                                                                                                                                                                                                                                                                                                                                           |
| <i>C. rhaetica</i> Hegetschw.                                          | <b><i>C. foetida</i> L. subsp. <i>rhoeadifolia</i> (Bieb.) Celak.</b>                                                                                                                                                                                                                                                                                                                                                                                                                                           |
| <i>C. rhoeadifolia</i> M. Bieb.                                        | <i>C. auriculifolia</i> Froel.; <i>C. incarnata</i> Vis.                                                                                                                                                                                                                                                                                                                                                                                                                                                        |
| <i>C. rubra</i> L.                                                     | <i>Crepis abyssinica</i> Sch.Bip; <i>Crepis adenothrix</i> Sch.Bip.; <i>Crepis forskalii</i> Babc.; <i>Crepis friesii</i> Babc.; <i>Crepis ugandensis</i> Babc.                                                                                                                                                                                                                                                                                                                                                 |
| <i>C. rueppellii</i> Sch. Bip                                          | <i>C. bifida</i> (Vis.) Muschl.; <i>C. kochiana</i> Boiss.; <i>C. nemausensis</i> Gouan; <i>C. roylei</i> (DC.) F. W. Schultz                                                                                                                                                                                                                                                                                                                                                                                   |
| <i>C. sancta</i> (L.) Bornm.                                           | <i>C. arabica</i> (Boiss. & Reut.) Boiss.; <i>C. radicata</i> var. <i>nuda</i> Pamp.;                                                                                                                                                                                                                                                                                                                                                                                                                           |
| <i>C. senecioides</i> Delile                                           | <i>C. agrestis</i> M.Bieb.; <i>C. aspera</i> Suter; <i>C. bannatica</i> Willd.; <i>C. hamata</i> Vitman; <i>C. hastata</i> Kit.; <i>C. hispida</i> Waldst. & Kit.; <i>C. muricata</i> Vitman; <i>C. nova</i> Winterl                                                                                                                                                                                                                                                                                            |
| <i>C. setosa</i> Haller f.                                             | <i>C. ruprechtii</i> Boiss.                                                                                                                                                                                                                                                                                                                                                                                                                                                                                     |
| <i>C. sibirica</i> L.                                                  | <i>Crepis alpina</i> var. <i>syriaca</i> Bornm.                                                                                                                                                                                                                                                                                                                                                                                                                                                                 |
| <i>C. syriaca</i> (Bornm.) Babc. & Navashin                            | <i>C. arvensis</i> Jáv.; <i>C. barckhausioides</i> Rouy; <i>C. campestris</i> Schur; <i>C. integrifolia</i> Vest; <i>C. lanceolata</i> Kit.; <i>C. murorum</i> S.G.Gmel.; <i>C. segetalis</i> Roth ex Steud.; <i>C. tectoria</i> Dulac; <i>C. tinctoria</i> Dulac                                                                                                                                                                                                                                               |
| <i>C. tectorum</i> L.                                                  | <i>C. hyoseridifolia</i> (Pers.) Rchb.                                                                                                                                                                                                                                                                                                                                                                                                                                                                          |
| <i>C. terglouensis</i> (Hacq.) Kern.                                   | <i>C. spathulata</i> subsp. <i>boetica</i> (Lange) Nyman                                                                                                                                                                                                                                                                                                                                                                                                                                                        |
| <i>C. tingitana</i> Ball                                               | <b><i>C. foetida</i> L.</b>                                                                                                                                                                                                                                                                                                                                                                                                                                                                                     |
| <i>C. thomsonii</i> Babc.                                              | <i>C. bicolor</i> Rchb.; <i>C. hiemalis</i> Biv.; <i>C. macrophylla</i> Desf.; <i>C. raphanifolia</i> Willd.; <i>C. scariosa</i> Willd.; <i>C. taraxacoides</i> Desf.                                                                                                                                                                                                                                                                                                                                           |
| <i>C. vesicaria</i> L.                                                 | <i>Crepis vesicaria</i> subsp. <i>taraxacifolia</i> (Thuill.) Thell.                                                                                                                                                                                                                                                                                                                                                                                                                                            |
| <i>Crepis vesicaria</i> L. subsp. <i>haenseleri</i> (Boiss.) P.D. Sell | <i>C. cinerea</i> Desf.; <i>C. hackelii</i> Lange; <i>C. haenseleri</i> (Boiss. ex DC.) F. W. Schultz; <i>C. heterocarpa</i> Nyman; <i>C. hyemalis</i> subsp. <i>hackelii</i> (Lange) Nyman; <i>C. intybacea</i> Brot.; <i>C. laciniata</i> Lowe; <i>C. numidica</i> Pomel; <i>C. polymorpha</i> Pourr.; <i>C. praecox</i> Balb.; <i>C. recognita</i> Haller f.; <i>C. rutilans</i> Lacaita; <i>C. scabra</i> Willd. <i>C. taraxacifolia</i> Thuill.; <i>C. taurinensis</i> Willd.; <i>C. umbellata</i> Thuill. |
| <i>C. vesicaria</i> L. subsp. <i>taraxicifolia</i> (Thuill.) Thell.    | <b><i>C. capillaris</i> (L.) Wallr.</b>                                                                                                                                                                                                                                                                                                                                                                                                                                                                         |
| <i>C. virens</i> L.                                                    |                                                                                                                                                                                                                                                                                                                                                                                                                                                                                                                 |
| <i>C. zacintha</i> (L.) Loisel.                                        |                                                                                                                                                                                                                                                                                                                                                                                                                                                                                                                 |

---
